# Supplementary material for: PRY-1/Axin signaling regulates lipid metabolism in Caenorhabditis elegans
Source: PubMed Central journal article supplement (PMC6221325; doi:10.1371/journal.pone.0206540), 2018-11-07
Supplement: pone.0206540.s011.pdf [file pone.0206540.s011.pdf]

**S2 Table. mRNA transcripts mapped to the *C. elegans* genome.**

|                           | <i>N2_1</i> | <i>N2_2</i> | <i>pry-1_1</i> | <i>pry-1_2</i> |
|---------------------------|-------------|-------------|----------------|----------------|
| Number of input reads     | 31398474    | 38382323    | 36861495       | 35886365       |
| Average input read length | 194         | 193         | 193            | 193            |

## UNIQUE READS

|                           |          |          |          |          |
|---------------------------|----------|----------|----------|----------|
| Number of reads           | 29693460 | 35944075 | 35124604 | 34111824 |
| Uniquely mapped reads %   | 94.57%   | 93.65%   | 95.29%   | 95.06%   |
| Average mapped length     | 192.8    | 192.79   | 192.66   | 192.6    |
| Mismatch rate per base, % | 0.11%    | 0.11%    | 0.11%    | 0.11%    |

## READS MAPPED TO MULTIPLE LOCI

|                                        |         |         |         |         |
|----------------------------------------|---------|---------|---------|---------|
| Number of reads                        | 1182683 | 1790500 | 1131080 | 1182083 |
| % of reads                             | 3.77%   | 4.66%   | 3.07%   | 3.29%   |
| Number of reads mapped to several loci | 75341   | 122959  | 79013   | 85400   |
| % of reads mapped to several loci      | 0.24%   | 0.32%   | 0.21%   | 0.24%   |

## UNMAPPED READS

|                                      |       |       |       |       |
|--------------------------------------|-------|-------|-------|-------|
| % of reads unmapped: many mismatches | 0.00% | 0.00% | 0.00% | 0.00% |
| % of reads unmapped: too short       | 1.39% | 1.33% | 1.40% | 1.38% |
| % of reads unmapped: other           | 0.03% | 0.03% | 0.03% | 0.03% |
